# Supplementary material for: Immunotherapies in neuromyelitis optica spectrum disorder: efficacy and predictors of response
Source: PubMed Central journal article supplement — J Neurol Neurosurg Psychiatry. 2017 Jun 1;88(8):639–47. doi: 10.1136/jnnp-2017-315603 (PMC5537514; doi:10.1136/jnnp-2017-315603), 2017-06-01
Supplement: jnnp-2017-315603supp001.pdf [file jnnp-2017-315603supp001.pdf]

## Supplemental Data

**Supplemental Table 1: Combination therapies in the NEMOS dataset.**

| First Drug           | Second Drug | Frequency | Comment                                                                                                                              |
|----------------------|-------------|-----------|--------------------------------------------------------------------------------------------------------------------------------------|
| CYC                  | AZA         | 1         |                                                                                                                                      |
| GLAT                 | AZA         | 1         |                                                                                                                                      |
| MTX                  | CYC         | 1         |                                                                                                                                      |
| MTX                  | IFN         | 1         |                                                                                                                                      |
| RTX                  | AZA         | 1         |                                                                                                                                      |
| RTX                  | CYC         | 3         |                                                                                                                                      |
| RTX                  | Mitox       | 1         |                                                                                                                                      |
| RTX                  | Alemtuzumab | 1         |                                                                                                                                      |
| Steroids intrathecal | Mitox       | 1         |                                                                                                                                      |
| Steroids intrathecal | RTX         | 1         |                                                                                                                                      |
| Steroids iv          | Mitox       | 1         |                                                                                                                                      |
| Steroids iv          | TOC         | 1         |                                                                                                                                      |
| Steroids oral        | AZA         | 7         | 3 cases with 3 month co-medication at treatment start<br>1 cases with intermittent steroids<br>3 cases with continuous co-medication |
| Steroids oral        | CYC         | 2         | 1 case continuously<br>1 case intermittent                                                                                           |
| Steroids oral        | RTX         | 2         |                                                                                                                                      |
| TCZ                  | RTX         | 1         |                                                                                                                                      |

Two triple combination:

RTX – Mitox – Steroids intrathecal

AZA – Steroids intrathecal – Steroids oral
